# Supplementary material for: Trends in US Surgical Procedures and Health Care System Response to Policies Curtailing Elective Surgical Operations During the COVID-19 Pandemic
Source: PubMed Central journal article supplement (PMC8655602; doi:10.1001/jamanetworkopen.2021.38038), 2021-12-08

## Supplemental Online Content

Mattingly AS, Rose L, Eddington HS, et al. Trends in US surgical procedures and health care system response to policies curtailing elective surgical operations during the COVID-19 pandemic. *JAMA Netw Open*. 2021;4(12):e2138038. doi:10.1001/jamanetworkopen.2021.38038

**eTable 1.** Surgical Procedure Volume and Incidence Ratio Rate During Initial Shutdown and COVID-19 Surge vs Prepandemic Rate

**eTable 2.** Surgical Procedure Volume by Subcategory During Initial Shutdown and COVID-19 Surge vs Prepandemic Rate

**eFigure.** Rates of Exemplar Procedures During Initial Shutdown and COVID-19 Surge Compared With Prepandemic Rate

This supplemental material has been provided by the authors to give readers additional information about their work.

**eTable 1.** Surgical Procedure Volume and Incidence Ratio Rate During Initial Shutdown and COVID-19 Surge vs Prepandemic Rate

| Surgical Category | Initial Shutdown<br>Weeks 12-18, 2020 <sup>a</sup> |         |                           |         | COVID-19 Surge<br>Week 44, 2020- Week 4, 2021 <sup>b</sup> |         |                           |         |
|-------------------|----------------------------------------------------|---------|---------------------------|---------|------------------------------------------------------------|---------|---------------------------|---------|
|                   | Volume <sup>c</sup>                                |         | IRR (95% CI) <sup>d</sup> | P value | Volume <sup>c</sup>                                        |         | IRR (95% CI) <sup>d</sup> | P value |
|                   | 2019                                               | 2020    |                           |         | 2019                                                       | 2020    |                           |         |
| <b>Overall</b>    | 905,444                                            | 458,469 | 0.52 (0.44-0.60)          | <0.001  | 797,510                                                    | 756,377 | 0.97 (0.95-1.00)          | 0.10    |
| Cataract          | 13,564                                             | 1,396   | 0.11 (-0.11-0.32)         | 0.03    | 24,430                                                     | 23,797  | 1.00 (0.90-1.09)          | 0.95    |
| ENT <sup>e</sup>  | 36,702                                             | 10,945  | 0.30 (0.13-0.46)          | <0.001  | 60,090                                                     | 41,701  | 0.70 (0.65-0.75)          | <0.001  |
| Musculoskeletal   | 150,145                                            | 53,473  | 0.36 (0.21-0.52)          | <0.001  | 293,100                                                    | 279,679 | 0.97 (0.89-1.05)          | 0.51    |
| Nervous           | 43,054                                             | 16,829  | 0.41 (0.26-0.55)          | <0.001  | 82,361                                                     | 80,291  | 1.01 (0.95-1.07)          | 0.71    |
| General           | 128,594                                            | 57,318  | 0.46 (0.33-0.59)          | <0.001  | 237,452                                                    | 222,696 | 0.97 (0.92-1.02)          | 0.22    |
| Urology           | 33,069                                             | 15,649  | 0.48 (0.36-0.61)          | <0.001  | 60,846                                                     | 60,708  | 1.02 (0.94-1.09)          | 0.63    |
| Cardiovascular    | 42,246                                             | 21,967  | 0.55 (0.44-0.65)          | <0.001  | 73,873                                                     | 69,310  | 0.98 (0.93-1.04)          | 0.61    |
| OB-GYN            | 92,934                                             | 53,205  | 0.60 (0.49-0.70)          | <0.001  | 174,908                                                    | 165,044 | 0.98 (0.94-1.03)          | 0.42    |
| Skin              | 358,959                                            | 223,975 | 0.63 (0.55-0.71)          | <0.001  | 635,449                                                    | 628,399 | 1.00 (0.95-1.04)          | 0.87    |
| Thoracic          | 5,633                                              | 3,314   | 0.64 (0.53-0.76)          | <0.001  | 9,829                                                      | 9,321   | 1.04 (0.94-1.13)          | 0.46    |
| Transplant        | 544                                                | 398     | 0.79 (0.59-1.00)          | 0.08    | 1,021                                                      | 986     | 1.05 (0.82-1.27)          | 0.68    |

<sup>a</sup> March 15, 2020- May 2, 2020

<sup>b</sup> October 25, 2020- January 30, 2021

<sup>c</sup> Absolute number of surgical procedures

<sup>d</sup> Incidence rate ratio (95% confidence interval), estimated from Poisson regression by comparing total procedure counts during epidemiological weeks in 2020 to the corresponding weeks in 2019

<sup>e</sup> Ears, Nose, Throat

**eTable 2.** Surgical Procedure Volume by Subcategory During Initial Shutdown and COVID-19 Surge vs Prepandemic Rate

| Surgical Category                      | Initial Shutdown<br>Weeks 12-18, 2020 <sup>a</sup> |         |                           |         | COVID-19 Surge<br>Week 44, 2020- Week 4, 2021 <sup>b</sup> |         |                           |         |
|----------------------------------------|----------------------------------------------------|---------|---------------------------|---------|------------------------------------------------------------|---------|---------------------------|---------|
|                                        | Volume <sup>c</sup>                                |         | IRR (95% CI) <sup>d</sup> | P value | Volume <sup>c</sup>                                        |         | IRR (95% CI) <sup>d</sup> | P value |
|                                        | 2019                                               | 2020    |                           |         | 2019                                                       | 2020    |                           |         |
| Cataract                               | 13,564                                             | 1,396   | 0.11 (-0.11-0.32)         | 0.03    | 24,430                                                     | 23,797  | 1.00 (0.90-1.09)          | 0.95    |
| Arthroplasty                           | 53,328                                             | 9,737   | 0.18 (-0.01-0.37)         | 0.001   | 107,235                                                    | 98,993  | 0.90 (0.79-1.01)          | 0.11    |
| Abdominal Hernia Repair                | 27,014                                             | 6,178   | 0.23 (0.08-0.39)          | <0.001  | 52,330                                                     | 46,484  | 0.91 (0.83-0.98)          | 0.02    |
| Male Reproductive                      | 6,103                                              | 1,577   | 0.26 (0.12-0.39)          | <0.001  | 11,610                                                     | 12,133  | 1.04 (0.94-1.14)          | 0.43    |
| Non-fracture Musculoskeletal           | 65,297                                             | 18,945  | 0.30 (0.13-0.46)          | <0.001  | 127,448                                                    | 121,899 | 0.98 (0.91-1.06)          | 0.62    |
| Ear, Nose, Throat                      | 36,702                                             | 10,945  | 0.30 (0.13-0.46)          | <0.001  | 60,090                                                     | 41,701  | 0.70 (0.65-0.75)          | <0.001  |
| Gynecology                             | 54,219                                             | 18,276  | 0.35 (0.19-0.51)          | <0.001  | 102,267                                                    | 98,220  | 0.99 (0.93-1.05)          | 0.80    |
| Skull, Brain, Meninges, and Nerves     | 20,824                                             | 7,401   | 0.37 (0.22-0.52)          | <0.001  | 40,130                                                     | 39,413  | 1.02 (0.96-1.09)          | 0.50    |
| Spine                                  | 22,230                                             | 9,428   | 0.44 (0.30-0.58)          | <0.001  | 42,231                                                     | 40,878  | 1.00 (0.93-1.07)          | 0.97    |
| Prostate                               | 5,617                                              | 2,563   | 0.48 (0.33-0.63)          | <0.001  | 10,006                                                     | 9,692   | 1.02 (0.91-1.13)          | 0.75    |
| Grafts, Flaps and other Reconstruction | 30,649                                             | 15,549  | 0.52 (0.40-0.63)          | <0.001  | 56,690                                                     | 56,525  | 1.01 (0.94-1.08)          | 0.72    |
| Solid Organ: HPB <sup>e</sup> , Spleen | 25,549                                             | 12,369  | 0.52 (0.37-0.66)          | <0.001  | 46,207                                                     | 42,910  | 1.00 (0.94-1.05)          | 0.90    |
| Hollow Viscus, Peritoneal Cavity       | 61,689                                             | 31,484  | 0.52 (0.42-0.62)          | <0.001  | 111,703                                                    | 106,839 | 0.98 (0.93-1.02)          | 0.37    |
| Breast, Endocrine                      | 14,342                                             | 7,287   | 0.52 (0.36-0.69)          | <0.001  | 27,212                                                     | 26,463  | 1.00 (0.93-1.08)          | 0.94    |
| Vascular                               | 29,885                                             | 15,315  | 0.55 (0.45-0.64)          | <0.001  | 51,873                                                     | 49,180  | 1.01 (0.95-1.07)          | 0.78    |
| Cardiac                                | 12,361                                             | 6,652   | 0.55 (0.44-0.66)          | <0.001  | 22,000                                                     | 20,130  | 0.93 (0.86-1.00)          | 0.04    |
| Kidney, Bladder, Urethra               | 21,349                                             | 11,509  | 0.55 (0.43-0.67)          | <0.001  | 39,230                                                     | 38,883  | 1.01 (0.94-1.08)          | 0.78    |
| Excision of Skin and Soft Tissue       | 214,614                                            | 118,204 | 0.58 (0.49-0.68)          | <0.001  | 369,927                                                    | 346,410 | 0.99 (0.94-1.04)          | 0.78    |
| Thoracic                               | 5,633                                              | 3,314   | 0.64 (0.53-0.76)          | <0.001  | 9,829                                                      | 9,321   | 1.04 (0.94-1.13)          | 0.46    |
| Incision, Drainage, and Debridement    | 113,696                                            | 90,222  | 0.73 (0.68-0.78)          | <0.001  | 208,832                                                    | 225,464 | 1.00 (0.94-1.05)          | 0.89    |
| Abortion                               | 6,370                                              | 4,531   | 0.77 (0.67-0.87)          | <0.001  | 11,194                                                     | 10,693  | 1.03 (0.95-1.12)          | 0.45    |
| Transplant                             | 544                                                | 398     | 0.79 (0.59-1.00)          | 0.08    | 1,021                                                      | 986     | 1.05 (0.82-1.27)          | 0.68    |
| Amputation                             | 6,091                                              | 4,904   | 0.81 (0.69-0.92)          | 0.004   | 10,832                                                     | 10,572  | 0.98 (0.90-1.06)          | 0.58    |
| Fracture                               | 25,429                                             | 19,887  | 0.86 (0.78-0.94)          | 0.001   | 47,585                                                     | 48,215  | 1.11 (1.04-1.19)          | 0.002   |

|                  |        |        |                  |      |        |        |                  |      |
|------------------|--------|--------|------------------|------|--------|--------|------------------|------|
| Cesarean Section | 32,345 | 30,398 | 0.98 (0.94-1.03) | 0.42 | 61,447 | 56,131 | 0.95 (0.90-1.01) | 0.11 |
|------------------|--------|--------|------------------|------|--------|--------|------------------|------|

<sup>a</sup> March 15, 2020- May 2, 2020

<sup>b</sup> October 25, 2020- January 30, 2021

<sup>c</sup> Absolute number of surgical procedures

<sup>d</sup> Incidence rate ratio (95% confidence interval), estimated from Poisson regression by comparing total procedure counts during epidemiological weeks in 2020 to the corresponding weeks in 2019

<sup>e</sup>HPB= hepato-pancreato-biliary

## eFigure. Rates of Exemplar Procedures During Initial Shutdown and COVID-19 Surge Compared With Prepandemic Rate

eFigure 1 Legend: Initial Shutdown = March 15, 2020- May 2, 2020; COVID-19 Surge = October 25, 2020- January 30, 2021; IRR= Incidence rate ratio, estimated from Poisson regression by comparing total procedure counts during epidemiological weeks in 2020 to the corresponding weeks in 2019. Error bars indicate 95% confidence interval. Exemplar procedures followed a predicted decline in volume from 2019 during the Initial Shutdown, based on level of urgency. Groin hernia repair and knee arthroplasty remained slightly lower than 2019 levels during the weeks representing the COVID-19 Surge. See Table 2 for exact values.

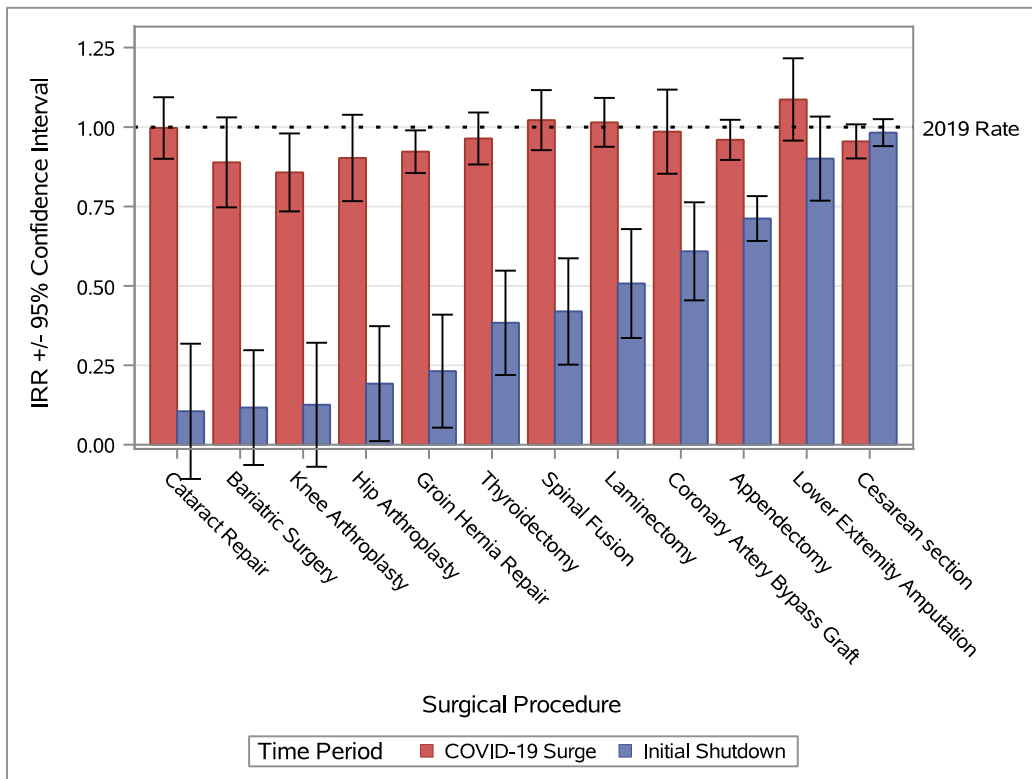

Supplement: jamanetwopen-e2138038-s001.pdf [file jamanetwopen-e2138038-s001.pdf]
